# Supplementary material for: Cross-Cultural Validation of the Barcelona Immigration Stress Scale
Source: J Immigr Minor Health. 2023 Jul 17;25(6):1339–53. doi: 10.1007/s10903-023-01520-2 (PMC10632226; doi:10.1007/s10903-023-01520-2)
Supplement: Supplementary file 2 — Supplementary file2 (PDF 163 KB) [file 10903_2023_1520_MOESM2_ESM.pdf]

## Escala Barcelona de Estrés del Inmigrante (BISS — 30)

|                                                                                                 | Totalmente de acuerdo (1) | Moderadamente de acuerdo (2) | Moderadamente en desacuerdo (3) | Totalmente en desacuerdo (4) |
|-------------------------------------------------------------------------------------------------|---------------------------|------------------------------|---------------------------------|------------------------------|
| 1 No tengo una vivienda adecuada                                                                |                           |                              |                                 |                              |
| 2 Siento que la gente, a menudo, no me incluye en sus actividades por pertenecer a otra cultura |                           |                              |                                 |                              |
| 3 Siento que la gente me observa cuando voy por la calle                                        |                           |                              |                                 |                              |
| 4 Me siento observado cuando entro en una tienda porque sospechan que voy a robar algo          |                           |                              |                                 |                              |
| 5 En este país, el inmigrante no tiene oportunidad de acceder a cargos de categoría             |                           |                              |                                 |                              |
| 6 Encuentro muchas dificultades para solucionar mis problemas                                   |                           |                              |                                 |                              |
| 7 La sociedad constantemente te recuerda que eres inmigrante                                    |                           |                              |                                 |                              |
| 8 Tengo dificultades económicas                                                                 |                           |                              |                                 |                              |
| 9 No estoy seguro de querer quedarme aquí                                                       |                           |                              |                                 |                              |
| 10 Me siento culpable por haber dejado a mi familia                                             |                           |                              |                                 |                              |
| 11 No podré aguantar mucho tiempo en la situación en la que me encuentro                        |                           |                              |                                 |                              |
| 12 Para tener éxito aquí hay que renunciar a tu cultura                                         |                           |                              |                                 |                              |
| 13 Echo de menos el ambiente de mi pueblo                                                       |                           |                              |                                 |                              |
| 14 Con frecuencia me siento tenso                                                               |                           |                              |                                 |                              |
| 15 Me siento solo                                                                               |                           |                              |                                 |                              |
| 16 La gente de aquí cree que los inmigrantes no tenemos derecho a los mismos derechos sociales  |                           |                              |                                 |                              |
| 17 Me siento presionado por la gente de este país a adoptar su modo de vida                     |                           |                              |                                 |                              |
| 18 Siento que he abandonado a mi familia                                                        |                           |                              |                                 |                              |
| 19 Me arrepiento de haber dejado mi país                                                        |                           |                              |                                 |                              |
| 20 La gente desconfía de mí por ser inmigrante                                                  |                           |                              |                                 |                              |
| 21 Me siento muy mal cuando pienso en todo lo que dejé en mi país                               |                           |                              |                                 |                              |
| 22 Desconfío de la gente de este país                                                           |                           |                              |                                 |                              |
| 23 Tengo demasiadas responsabilidades                                                           |                           |                              |                                 |                              |
| 24 Echo de menos a mi familia                                                                   |                           |                              |                                 |                              |
| 25 He sentido que mi cultura era despreciada                                                    |                           |                              |                                 |                              |
| 26 Me preocupa mucho mi salud                                                                   |                           |                              |                                 |                              |
| 27 La gente de aquí nunca aceptaría a un inmigrante en su familia                               |                           |                              |                                 |                              |
| 28 Me siento molesto porque la gente de aquí no entiende mis valores culturales                 |                           |                              |                                 |                              |
| 29 Me preocupa no poder mantener a mi familia                                                   |                           |                              |                                 |                              |
| 30 Me siento discriminado a la hora de acceder a una vivienda                                   |                           |                              |                                 |                              |

Ítems por subescalas: Discriminación (2, 3, 4, 5, 7, 12, 16, 17, 20, 22, 25, 27, 28, 30), Estrés Psicosocial (1, 6, 8, 11, 14, 15, 23, 26, 29), Nostalgia (9, 10, 13, 18, 19, 21, 24). Recomendamos promediar los ítems de cada subescala para que todas las puntuaciones tengan un rango de 1 a 4. Esta escala se ha construido desde una perspectiva dimensional del estrés y, por lo tanto, no considera el uso de puntos de corte.
